# Supplementary material for: ADRA2A and IRX1 are putative risk genes for Raynaud’s phenomenon
Source: bioRxiv or medRxiv preprint supplement (doi:10.1101/2022.10.19.22281276), 2023-08-28
Supplement: Supplementary file [file media-3.pdf]

## **Supplementary Data Legends**

File Name: Supplementary Data 1

Description: Results from cis-eQTL mapping for regional sentinels for Raynaud's syndrome; Statistics for RP were derived from logistic regression models and statistics for gene expression derived from linear regression models.

File Name: Supplementary Data 2

Description: Sources of publicly available GWAS

File Name: Supplementary Data 3

Description: Results from genetic correlation analysis using selected traits

File Name: Supplementary Data 4

Description: Results from genetic correlation analysis across 185 phecodes with two-sided tests of significance.

File Name: Supplementary Data 5

Description: Summary of genetically prioritized drug targets and drugs in trials for Raynaud's phenomenon

File Name: Supplementary Data 6

Description: Electronic health records codes for identification of used conditions and diseases
